# Supplementary material for: Heterogeneity of aquaporin-4 localization and expression after focal cerebral ischemia underlies differences in white versus grey matter swelling
Source: PubMed Central journal article supplement (PMC4588314; doi:10.1186/s40478-015-0239-6), 2015-09-30
Supplement: 40478_2015_239_MOESM1_ESM.pdf [file 40478_2015_239_MOESM1_ESM.pdf]

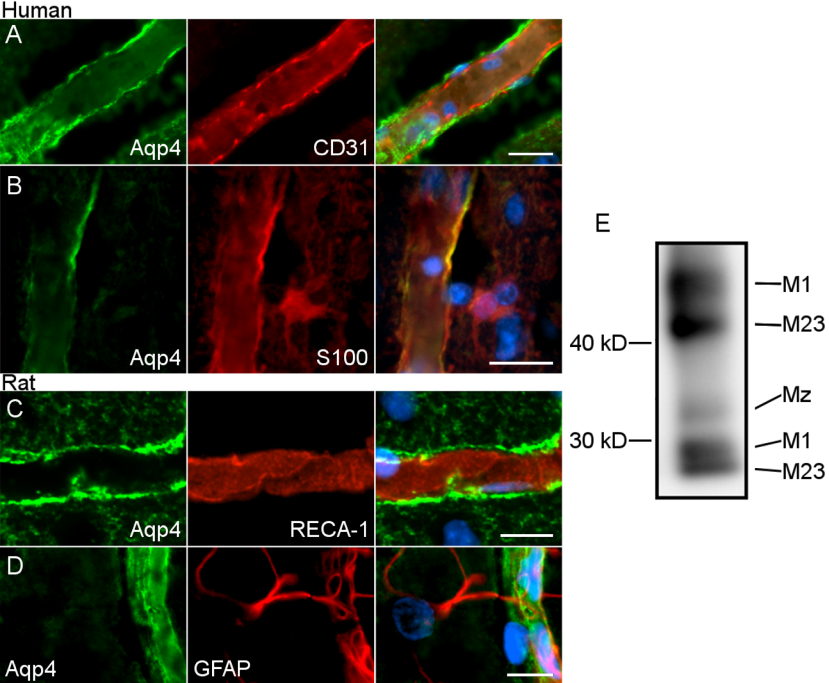

**SUPPLEMENTAL FIGURE 1** Validation of Aqp4 antibody. **(A, B)** micrographs of human control brain tissue immunolabeled for Aqp4 (green) and co-labeled for CD-31 (red) or S100 (red). **(C, D)** micrographs of rat control brain tissue immunolabeled for Aqp4 (green) and co-labeled for RECA-1 (red) or GFAP (red); co-labeling is indicated by yellow hue; Aqp4 immunoreactivity was present surrounding cerebral vessels in human tissue **(A)** and rat tissue **(C)**, and was localized to astrocyte endfeet, but not astrocyte somata in human tissue **(B)** and in rat tissue **(D)**. Scale bar 20  $\mu$ m. **(E)** Aqp4 immunoblot showing M23 and M1 Aqp4 isoforms in monomer form at ~26-29 kDa and in dimer form at ~40-50 kDa, and Mz Aqp4 isoform at ~33 kDa, demonstrating specificity of anti-Aqp4 antibody
